# Supplementary material for: MTUS1 is Correlated with Immune Infiltration and Acts as a Promising Diagnostic and Prognostic Biomarker for Colorectal Cancer.
Source: Research Square preprint supplement (doi:10.21203/rs.3.rs-1147510/v1), 2021-12-21
Supplement: Supplementary file 1 [file 50fc62289d7982c4f60f2ef6.pdf]

| Characteristic   | levels                | Overall     |
|------------------|-----------------------|-------------|
| n                |                       | 644         |
| Age              | <=65                  | 276 (42.9%) |
|                  | >65                   | 368 (57.1%) |
| Gender           | Female                | 301 (46.7%) |
|                  | Male                  | 343 (53.3%) |
| T stage          | T1                    | 20 (3.1%)   |
|                  | T2                    | 111 (17.3%) |
|                  | T3                    | 436 (68%)   |
|                  | T4                    | 74 (11.5%)  |
| N stage          | N0                    | 368 (57.5%) |
|                  | N1                    | 153 (23.9%) |
|                  | N2                    | 119 (18.6%) |
| M stage          | M0                    | 475 (84.2%) |
|                  | M1                    | 89 (15.8%)  |
| Pathologic stage | Stage I               | 111 (17.8%) |
|                  | Stage II              | 238 (38.2%) |
|                  | Stage III             | 184 (29.5%) |
|                  | Stage IV              | 90 (14.4%)  |
| CEA level        | <=5                   | 261 (62.9%) |
|                  | >5                    | 154 (37.1%) |
| Neoplasm type    | Colon adenocarcinoma  | 478 (74.2%) |
|                  | Rectum adenocarcinoma | 166 (25.8%) |
| OS event         | Alive                 | 515 (80%)   |
|                  | Dead                  | 129 (20%)   |
